# Supplementary material
Source: ML conference proceedings conference paper supplement (https://proceedings.neurips.cc/paper_files/paper/2021/hash/33853141e0873909be88f5c3e6144cc6-Abstract.html)
Supplement: Supplementary file 1 [file 33853141e0873909be88f5c3e6144cc6-Supplemental.pdf]

## 506 A Proofs

### 507 A.1 Proof of Theorem 1

508 Due to the feasibility of  $\{\widehat{\Theta}_t\}_{t=0}^T$ , one can write  $\|\widehat{\Theta}_t - \widetilde{F}^*(\widehat{\Sigma}_t)\|_\infty \leq \lambda_t$ . Combined with the first  
509 assumption of the theorem, this implies that

$$\begin{aligned} \|\widehat{\Theta}_t - \Theta_t^*\|_\infty &= \|\widehat{\Theta}_t - \widetilde{F}^*(\widehat{\Sigma}_t) + \widetilde{F}^*(\widehat{\Sigma}_t) - \Theta_t^*\|_\infty \\ &\leq \|\widehat{\Theta}_t - \widetilde{F}^*(\widehat{\Sigma}_t)\|_\infty + \|\Theta_t^* - \widetilde{F}^*(\widehat{\Sigma}_t)\|_\infty \\ &< 2\lambda_t, \end{aligned} \quad (9)$$

510 thereby establishing the element-wise estimation error bound. We proceed to show the sparsistency  
511 of the estimated parameters. First, suppose that  $\Theta_{t;ij}^* \neq 0$  for some time  $t$  and index  $(i, j)$ . One can  
512 write

$$\begin{aligned} |\widehat{\Theta}_{t;ij}| &= |\widehat{\Theta}_{t;ij} - \Theta_{t;ij}^* + \Theta_{t;ij}^*| \\ &\geq |\Theta_{t;ij}^*| - |\widehat{\Theta}_{t;ij} - \Theta_{t;ij}^*| \\ &> 0 \end{aligned} \quad (10)$$

513 where the last inequality is due to the second assumption of the theorem and (9). This implies that  
514  $\text{supp}(\Theta_t^*) \subseteq \text{supp}(\widehat{\Theta}_t)$ . Similarly, suppose that  $\Theta_{t;ij}^* - \Theta_{t-1;ij}^* \neq 0$  for some time  $t > 0$  and index  
515  $(i, j)$ . One can write

$$\begin{aligned} |\widehat{\Theta}_{t;ij} - \widehat{\Theta}_{t-1;ij}| &= |\widehat{\Theta}_{t;ij} - \Theta_{t;ij}^* + \Theta_{t;ij}^* - \Theta_{t-1;ij}^* + \Theta_{t-1;ij}^* - \widehat{\Theta}_{t-1;ij}| \\ &\geq |\Theta_{t;ij}^* - \Theta_{t-1;ij}^*| - |\widehat{\Theta}_{t;ij} - \Theta_{t;ij}^*| - |\widehat{\Theta}_{t-1;ij} - \Theta_{t-1;ij}^*| \\ &> 0 \end{aligned} \quad (11)$$

516 where the last inequality is due to the third assumption of the theorem and (9). This implies that  
517  $\text{supp}(\Theta_t^* - \Theta_{t-1}^*) \subseteq \text{supp}(\widehat{\Theta}_t - \widehat{\Theta}_{t-1})$ . Finally, due to the optimality of  $\{\widehat{\Theta}_t\}_{t=0}^T$  and feasibility of  
518  $\{\Theta_t^*\}_{t=0}^T$ , one can write

$$\begin{aligned} (1-\gamma) \sum_{t=0}^T \|\widehat{\Theta}_t\|_0 + \gamma \sum_{t=1}^T \|\widehat{\Theta}_t - \widehat{\Theta}_{t-1}\|_0 &\leq (1-\gamma) \sum_{t=0}^T \|\Theta_t^*\|_0 + \gamma \sum_{t=1}^T \|\Theta_t^* - \Theta_{t-1}^*\|_0 \\ \implies (1-\gamma) \sum_{t=0}^T \left( \sum_{(i,j) \notin \mathcal{S}_t} |\widehat{\Theta}_{t;ij}|_0 + \sum_{(i,j) \in \mathcal{S}_t} |\widehat{\Theta}_{t;ij}|_0 \right) & \quad (12) \\ + \gamma \sum_{t=1}^T \left( \sum_{(i,j) \notin \mathcal{D}_t} |\widehat{\Theta}_{t;ij} - \widehat{\Theta}_{t-1;ij}|_0 + \sum_{(i,j) \in \mathcal{D}_t} |\widehat{\Theta}_{t;ij} - \widehat{\Theta}_{t-1;ij}|_0 \right) & \\ \leq (1-\gamma) \sum_{t=0}^T \sum_{(i,j) \in \mathcal{S}_t} |\Theta_{t;ij}^*|_0 + \gamma \sum_{t=1}^T \sum_{(i,j) \in \mathcal{D}_t} |\Theta_{t;ij}^* - \Theta_{t-1;ij}^*|_0 & \\ \implies (1-\gamma) \sum_{t=0}^T \sum_{(i,j) \notin \mathcal{S}_t} |\widehat{\Theta}_{t;ij}|_0 + \gamma \sum_{t=1}^T \sum_{(i,j) \notin \mathcal{D}_t} |\widehat{\Theta}_{t;ij} - \widehat{\Theta}_{t-1;ij}|_0 &\leq 0 \end{aligned} \quad (13)$$

519 where the last inequality follows from  $\text{supp}(\Theta_t^*) \subseteq \text{supp}(\widehat{\Theta}_t)$  and  $\text{supp}(\Theta_t^* - \Theta_{t-1}^*) \subseteq \text{supp}(\widehat{\Theta}_t -$   
520  $\widehat{\Theta}_{t-1})$ , which implies  $\sum_{(i,j) \in \mathcal{S}_t} |\widehat{\Theta}_{t;ij}|_0 - |\Theta_{t;ij}^*|_0 \geq 0$  and  $\sum_{(i,j) \in \mathcal{D}_t} |\widehat{\Theta}_{t;ij} - \widehat{\Theta}_{t-1;ij}|_0 - |\Theta_{t;ij}^* -$   
521  $\Theta_{t-1;ij}^*|_0 \geq 0$  for every  $t$ . Due to  $0 < \gamma < 1$ , the above inequality implies that  $\widehat{\Theta}_{t;ij} = 0$   
522 for every  $t$  and  $(i, j) \notin \mathcal{S}_t$ , and  $\widehat{\Theta}_{t;ij} - \widehat{\Theta}_{t-1;ij} = 0$  for every  $t > 0$  and  $(i, j) \notin \mathcal{D}_t$ . This  
523 implies that  $\text{supp}(\widehat{\Theta}_t) \subseteq \text{supp}(\Theta_t^*)$  and  $\text{supp}(\widehat{\Theta}_t - \widehat{\Theta}_{t-1}) \subseteq \text{supp}(\Theta_t^* - \Theta_{t-1}^*)$ . Finally, since  
524  $\text{supp}(\widehat{\Theta}_t) \subseteq \text{supp}(\Theta_t^*)$ , we have  $|\text{supp}(\widehat{\Theta}_t - \Theta_t^*)| = |\mathcal{S}_t|$ . This, together with (9) implies that  
525  $\|\widehat{\Theta}_t - \Theta_t^*\|_2 \leq \sqrt{|\mathcal{S}_t|} \|\widehat{\Theta}_t - \Theta_t^*\|_\infty \leq 2\sqrt{|\mathcal{S}_t|} \lambda_t$ , thereby completing the proof.  $\square$

526 **A.2 Proof of Theorem 3**

527 For simplicity of notation, we drop the subscript from the definition of  $s_d(\cdot, \cdot)$ . The proof is inspired  
 528 by Corollary 1 in [47]. First, we present the following key lemmas.

529 **Lemma 1** (Lemma 2 of [47] and Lemma 1 of [34]). *Suppose that  $X^{(i)} \sim \mathcal{N}(0, \Sigma)$  for  $i = 1, \dots, N$ ,  
 530 and  $\widehat{\Sigma} = \frac{1}{N} \sum_{i=1}^N X^{(i)} X^{(i)\top}$ . Then, we have*

$$\left\| \widehat{\Sigma} - \Sigma \right\|_{\infty/\infty} \leq 8 \left( \max_i \Sigma_{ii} \right) \sqrt{\frac{\tau \log d}{N}} \quad (14)$$

531 *with probability of at least  $1 - 4d^{-\tau+2}$  for any  $\tau > 2$ , provided that  $N \geq 40 (\max_i \Sigma_{ii})$ .*

532 **Lemma 2** (Lemma 1 of [47]; modified). *Under the conditions of Lemma 1, we have*

$$\left\| \text{ST}_{\nu}(\widehat{\Sigma}) - \Sigma \right\|_{\infty} \leq 5\nu^{1-q} s(q, d) + 24\nu^{-q} s(q, d) \left( \max_i \Sigma_{ii} \right) \sqrt{\frac{\tau \log d}{N}} \quad (15)$$

533 *with probability of at least  $1 - 4d^{-\tau+2}$  for any  $\tau > 2$ , provided that  $N \geq 40 (\max_i \Sigma_{ii})$ .*

534 Based on the above lemmas, we proceed to present the proof of Corollary 3.

535 *Proof of Corollary 3.* It suffices to show that the conditions of Theorem 1 are satisfied with the  
 536 proposed choices of  $\lambda_t$  and  $\nu_t$ . It is easy to see that

$$\begin{aligned} \left\| \Theta_t - [\text{ST}_{\nu_t}(\widehat{\Sigma}_t)]^{-1} \right\|_{\infty/\infty} &= \left\| [\text{ST}_{\nu_t}(\widehat{\Sigma}_t)]^{-1} (\text{ST}_{\nu_t}(\widehat{\Sigma}_t) \Theta_t - I) \right\|_{\infty/\infty} \\ &\leq \left\| [\text{ST}_{\nu_t}(\widehat{\Sigma}_t)]^{-1} \right\|_{\infty} \left\| \Theta_t \right\|_{\infty} \left\| \text{ST}_{\nu_t}(\widehat{\Sigma}_t) - \Sigma_t \right\|_{\infty/\infty} \end{aligned} \quad (16)$$

537 We provide separate bounds for different terms of the above inequality. Due to Assumption 1, one  
 538 can write  $\|\Theta_t\|_{\infty} \leq \kappa_1$ . Moreover, due to Lemma 1, the following inequality holds with probability  
 539 of at least  $1 - 4d^{-\tau+2}$  for any  $\tau > 2$

$$\begin{aligned} \left\| \text{ST}_{\nu_t}(\widehat{\Sigma}_t) - \Sigma_t \right\|_{\infty/\infty} &\leq \left\| \text{ST}_{\nu_t}(\widehat{\Sigma}_t) - \widehat{\Sigma}_t \right\|_{\infty/\infty} + \left\| \widehat{\Sigma}_t - \Sigma_t \right\|_{\infty/\infty} \\ &\leq \nu_t + 8\kappa_3 \sqrt{\frac{\tau \log d}{N_t}} \\ &= 16\kappa_3 \sqrt{\frac{\tau \log d}{N_t}} \end{aligned} \quad (17)$$

540 provided that  $N_t \geq 40\kappa_3$  and  $\nu_t = 8\kappa_3 \sqrt{\frac{\tau \log d}{N_t}}$ . Finally, for any vector  $w$ , one can write

$$\begin{aligned} \left\| \text{ST}_{\nu_t}(\widehat{\Sigma}_t) w \right\|_{\infty} &\geq \left\| \Sigma_t w \right\|_{\infty} - \left\| (\text{ST}_{\nu_t}(\widehat{\Sigma}_t) - \Sigma_t) w \right\|_{\infty} \\ &\geq \left( \kappa_2 - \left\| \text{ST}_{\nu_t}(\widehat{\Sigma}_t) - \Sigma_t \right\|_{\infty} \right) \|w\|_{\infty} \end{aligned} \quad (18)$$

541 On the other hand, the aforementioned choice of  $\nu_t$  and Lemma 2 implies that

$$\left\| \text{ST}_{\nu_t}(\widehat{\Sigma}_t) - \Sigma_t \right\|_{\infty} \leq 64\kappa_3^{1-q} s(q, d) \left( \frac{\tau \log d}{N_t} \right)^{\frac{1-q}{2}} \quad (19)$$

542 Combining this inequality with (18) leads to

$$\left\| \text{ST}_{\nu_t}(\widehat{\Sigma}_t) - \Sigma_t \right\|_{\infty} \leq \frac{\kappa_2}{2} \quad (20)$$

543 provided that

$$N_t \geq \left( \frac{128s(q, d)}{\kappa_2} \right)^{\frac{2}{1-q}} \kappa_3^2 \tau \log d \quad (21)$$

544 This implies that  $\|\text{ST}_{\nu_t}(\widehat{\Sigma}_t)w\|_\infty \geq \frac{\kappa_2}{2}\|w\|_\infty$ , and hence,  $\left\|[\text{ST}_{\nu_t}(\widehat{\Sigma}_t)]^{-1}\right\|_\infty \leq \frac{2}{\kappa_2}$ . Combining  
 545 these bounds with (22) yields

$$\left\|\Theta_t - [\text{ST}_{\nu_t}(\widehat{\Sigma}_t)]^{-1}\right\|_{\infty/\infty} \leq \frac{32\kappa_1\kappa_3}{\kappa_2} \sqrt{\frac{\tau \log d}{N_t}} = \lambda_t \quad (22)$$

546 with probability of at least  $1 - 4d^{-\tau+2}$ . Finally, we need to verify that the conditions  $\lambda_t \leq \Theta_t^{\min}/2$   
 547 and  $\lambda_t + \lambda_{t-1} \leq \Delta\Theta_t^{\min}/2$  hold. Based on the above definition of  $\lambda_t$ , it is easy to see that both of  
 548 these conditions are satisfied if

$$\begin{aligned} N_t &\geq \left(\frac{128\kappa_1\kappa_3}{\kappa_2}\right)^2 \max\left\{(\Theta_t^{\min})^{-2}, (\Delta\Theta_t^{\min})^{-2}, (\Delta\Theta_{t-1}^{\min})^{-2}\right\} \tau \log d \\ \implies N_t &\gtrsim \tau \log d \end{aligned} \quad (23)$$

549 Based on our assumption, we have  $T+1 \leq Cd^\zeta$  for some universal constant  $C > 0$ . Therefore, a  
 550 simple union bound over  $t = 0, \dots, T$  implies that the statements of the corollary holds for every  
 551  $t = 0, \dots, T$  with the probability of at least

$$1 - 4 \sum_{t=0}^T d^{-\tau+2} \geq 1 - 4(T+1)d^{-\tau+2} \geq 1 - 4d^{\zeta-\tau+2} \quad (24)$$

552 Selecting  $\tau > \zeta + 2$  completes the proof.  $\square$

### 553 A.3 Proof of Theorem 4

554 First, we delineate the imposed assumptions on the selected kernel function.

555 **Assumption 3** ([16]). *The kernel  $K(x)$  satisfies the following conditions:*

- 556 -  $\int_{-1}^1 K(x)dx = 1$ ,
- 557 -  $\int_{-1}^1 x^2 K(x)dx \leq \infty$ ,
- 558 -  $K(x)$  is uniformly bounded on its support,
- 559 -  $\sup_{-1 \leq x \leq 1} K''(x/h) = \mathcal{O}(h^{-4})$ .

560 The following key lemmas are borrowed from [16].

561 **Lemma 3** (Lemma 5 of [16]). *For any fixed  $t$ , we have*

$$\left\|\mathbb{E}[\Sigma_t^w] - \Sigma(t/T)\right\|_{\infty/\infty} \lesssim C \left(h + \frac{1}{T^2 h^5}\right) \quad (25)$$

562 for some constant  $C > 0$ .

563 **Lemma 4** (Lemma 2 of [16]). *There exists a constant  $c > 0$  such that*

$$\mathbb{P}(|[\Sigma_t^w]_{ij} - \mathbb{E}[\Sigma_t^w]_{ij}| \geq \epsilon) \leq 2 \exp(-cTh\epsilon^2) \quad (26)$$

564 for every  $\epsilon > 0$  and any fixed  $t$ .

565 Combining the above lemmas gives rise to the following result.

566 **Lemma 5.** *Assume that  $h = T^{-1/3}$ . Then, the following inequality holds for any  $t$  and  $\tau > 2$*

$$\left\|\widehat{\Sigma}_t^w - \Sigma(t/T)\right\|_{\infty/\infty} \lesssim \frac{\sqrt{\tau \log d}}{T^{1/3}} \quad (27)$$

567 with probability of at least  $1 - d^{-(\tau-2)}$ .

568 *Proof.* Based on Lemma 4, one can write

$$\mathbb{P}\left(\left\|\widehat{\Sigma}_t^w - \mathbb{E}[\Sigma_t^w]\right\|_{\infty/\infty} \geq \epsilon\right) \leq 2 \exp(2 \log d - cTh\epsilon^2) \quad (28)$$

569 Upon choosing  $\epsilon = \sqrt{\frac{\tau \log d}{cTh}}$  for some  $\tau > 2$ , we have

$$\left\| \widehat{\Sigma}_t^w - \mathbb{E}[\Sigma_t^w] \right\|_{\infty/\infty} \leq \sqrt{\frac{\tau \log d}{cTh}} \quad (29)$$

570 with probability of at least  $1 - d^{-(\tau-2)}$ . Combined with Lemma 3, the following chain of inequalities  
571 hold with the same probability

$$\begin{aligned} \left\| \widehat{\Sigma}_t^w - \Sigma(t/T) \right\|_{\infty/\infty} &\leq \left\| \widehat{\Sigma}_t^w - \mathbb{E}[\Sigma_t^w] \right\|_{\infty/\infty} + \left\| \mathbb{E}[\Sigma_t^w] - \Sigma(t/T) \right\|_{\infty/\infty} \\ &\leq \sqrt{\frac{\tau \log d}{cTh}} + C \left( h + \frac{1}{T^2 h^5} \right) \end{aligned} \quad (30)$$

572 Replacing  $h = T^{-1/3}$  in the above inequality gives rise to

$$\left\| \widehat{\Sigma}_t^w - \Sigma(t/T) \right\|_{\infty/\infty} \lesssim \frac{\sqrt{\tau \log d}}{T^{1/3}} \quad (31)$$

573 which completes the proof.  $\square$

574 **Lemma 6.** Assume that  $h = T^{-1/3}$ . Then, the following inequality holds for any  $t$  and  $\tau > 2$

$$\left\| \mathbf{ST}_{\nu_t}(\widehat{\Sigma}_t^w) - \Sigma(t/T) \right\|_{\infty} \lesssim \nu^{1-q} s(q, d) + \nu^{-q} s(q, d) \frac{\sqrt{\tau \log d}}{T^{1/3}} \quad (32)$$

575 with probability of at least  $1 - d^{-\tau+2}$ .

576 *Proof.* The proof is implied by Lemma 1 of [47] and Lemma 5.  $\square$

577 *Proof of Corollary 4.* We only provide a sketch of the proof, due to its similarity to the proof of  
578 Corollary 3. One can write

$$\left\| \Theta(t/T) - [\mathbf{ST}_{\nu_t}(\widehat{\Sigma}_t^w)]^{-1} \right\|_{\infty/\infty} \leq \left\| [\mathbf{ST}_{\nu_t}(\widehat{\Sigma}_t^w)]^{-1} \right\|_{\infty} \left\| \Theta(t/T) \right\|_{\infty} \left\| \mathbf{ST}_{\nu_t}(\widehat{\Sigma}_t^w) - \Sigma(t/T) \right\|_{\infty/\infty} \quad (33)$$

579 Due to Assumption 2, we have  $\left\| \Theta(t/T) \right\|_{\infty} \leq \kappa_1$ . Furthermore, similar to (18), one can write

$$\begin{aligned} \left\| \mathbf{ST}_{\nu_t}(\widehat{\Sigma}_t^w) - \Sigma(t/T) \right\|_{\infty/\infty} &\leq \left\| \mathbf{ST}_{\nu_t}(\widehat{\Sigma}_t^w) - \widehat{\Sigma}_t^w \right\|_{\infty/\infty} + \left\| \widehat{\Sigma}_t^w - \Sigma(t/T) \right\|_{\infty/\infty} \\ &\lesssim \frac{\sqrt{\tau \log d}}{T^{1/3}} \end{aligned} \quad (34)$$

580 with probability of at least  $1 - d^{-\tau+2}$ , where the second inequality follows from Lemma 5 and  
581 the choice of  $\nu_t \asymp \frac{\sqrt{\tau \log d}}{T^{1/3}}$ . Finally, Lemma 6 combined with an argument similar to the proof of  
582 Corollary 3 leads to

$$\left\| [\mathbf{ST}_{\nu_t}(\widehat{\Sigma}_t^w)]^{-1} \right\|_{\infty} \leq \frac{2}{\kappa_2} \quad (35)$$

583 provided that

$$T \gtrsim s(q, d)^{\frac{3}{1-q}} (\tau \log d)^{3/2} \quad (36)$$

584 Combining these inequalities leads to the desired upper bound on (33). The rest of the proof is similar  
585 to that of Corollary 3 and omitted for brevity.  $\square$

586 **A.4 Proof of Proposition 1**

Let  $\delta_1 < \delta_2 < \dots < \delta_m = T$  be the elements of the set  $\Gamma$  from Algorithm 1, and define  $\delta_0 = -1$ . By construction,  $\Delta_{\delta_{i-1}+1 \rightarrow \delta_i+1}^\cap = \emptyset$  for all  $i = 1, \dots, m-1$ . It follows that for any  $\theta$  satisfying bound constraints (7b) and  $i = 1, \dots, m-1$ , we have that

$$\sum_{t=\delta_{i-1}+1}^{\delta_i} \mathbb{1}\{\theta_{t+1} - \theta_t \neq 0\} \geq 1.$$

587 Given any  $j = 1, \dots, T$ , let  $h$  be the maximum index such that  $\delta_h < j$ . Therefore, we find that for  
588 any feasible  $\theta$ ,

$$f_{0 \rightarrow j}(\theta) = \sum_{t=0}^{j-1} \mathbb{1}\{\theta_{t+1} - \theta_t \neq 0\} \geq \sum_{t=0}^{\delta_h} \mathbb{1}\{\theta_{t+1} - \theta_t \neq 0\} = \sum_{i=1}^h \sum_{t=\delta_{i-1}+1}^{\delta_i} \mathbb{1}\{\theta_{t+1} - \theta_t \neq 0\} \geq h.$$

589 Since  $f_{0 \rightarrow j}(\theta^{\text{greedy}}) = h$  meets this lower bound, it follows that  $\{\theta_t^{\text{greedy}}\}_{t=0}^j$  is indeed an optimal  
590 solution to  $\text{OPT}_{0 \rightarrow j}(1)$ . Setting  $j = T$  and  $h = m-1$ , we find that  $\theta^{\text{greedy}}$  is optimal for  $\text{OPT}_{0 \rightarrow T}(1)$ .  
591  $\square$

592 **A.5 Proof of Theorem 5**

593 Before proving this theorem, we need the following intermediate lemma:

594 **Lemma 7.** *Given any optimal solution  $\hat{\theta}$  to (7), exactly one of the following holds for any given  
595 zero-feasible sequence  $\mathcal{Z}_{i \rightarrow j}$ :*

596 1.  $\hat{\theta}_i = \hat{\theta}_{i+1} = \dots = \hat{\theta}_j = 0$

597 2.  $\hat{\theta}_\tau \neq 0$  for all  $\tau = i, \dots, j$ .

598 *Proof.* Let  $\theta$  be any feasible solution to (3) that does not satisfy the conditions of Proposition 7, i.e.,  
599 there exists  $\tau = i, \dots, j-1$  such that either  $\theta_\tau = 0$  and  $\theta_{\tau+1} \neq 0$ , or  $\theta_\tau \neq 0$  and  $\theta_{\tau+1} = 0$ . We  
600 now show how to construct a solution  $\hat{\theta}$  with improved objective value, i.e.,  $f_{0 \rightarrow T}(\hat{\theta}) < f_{0 \rightarrow T}(\theta)$ .

Consider the case  $\theta_\tau = 0$  and  $\theta_{\tau+1} \neq 0$ . Define  $\hat{\theta}_{\tau+1} = 0$  and  $\hat{\theta}_t = \theta_t$  for all other coordinates  
 $t \neq \tau+1$ . Clearly,  $\hat{\theta}$  satisfies all bound constraints (3). Moreover,

$$f_{0 \rightarrow T}(\hat{\theta}) = f_{0 \rightarrow T}(\theta) - \underbrace{(1-\gamma)}_{\hat{\theta}_{\tau+1}=0} - \underbrace{\gamma}_{\hat{\theta}_\tau = \hat{\theta}_{\tau+1}} + \underbrace{\gamma \mathbb{1}\{\hat{\theta}_{\tau+1} \neq \hat{\theta}_{\tau+2}\}}_{\text{this term is 0 if } \tau+1=T} \leq f_{0 \rightarrow T}(\theta) - (1-\gamma) < f_{0 \rightarrow T}(\theta).$$

601 The case  $\theta_\tau \neq 0$  and  $\theta_{\tau+1} = 0$  is handled analogously.  $\square$

602 Since Lemma 7 holds for any zero-feasible sequence, it holds in particular for all maximal zero-  
603 feasible sequences. Based on this lemma, we are ready to present the proof of Theorem 5.

604 *Proof of Theorem 5.* Let  $\hat{\theta}$  be an optimal solution to (7). Due to the optimality of  $\hat{\theta}$ , the conditions in  
605 Lemma 7 are satisfied for all maximal nonzero intervals. We first show that there exists a path in  $\mathcal{G}$   
606 with cost  $f(\hat{\theta})$ , and then we show that this path is indeed a shortest path.

607 Let  $V_0 = \{v_1, v_2, \dots, v_m\} \subseteq \{1, \dots, Z\}$  be the set of indexes of the maximal zero-feasible se-  
608 quences where  $\hat{\theta}$  vanishes, i.e.,  $\hat{\theta}_{\mathcal{Z}_{i_s \rightarrow j_s}} = 0$  for every  $s \in V_0$ . It is easy to verify that  $f^*$  is the  
609 optimal cost for the following constrained optimization:

$$f_{0 \rightarrow T}(\hat{\theta}) = \min_{\{\theta_t\}_{t=0}^T} (1-\gamma) \left( T+1 - \left| \bigcup_{h=1}^m \mathcal{Z}_{i_{v_h} \rightarrow j_{v_h}} \right| \right) + \gamma \sum_{t=1}^T \mathbb{1}\{\theta_t - \theta_{t-1} \neq 0\} \quad (37a)$$

$$\text{subject to } l_t \leq \theta_t \leq u_t = 0, \dots, T \quad (37b)$$

$$\theta_t = 0 \quad t \in \bigcup_{h=1}^m \mathcal{Z}_{i_{v_h} \rightarrow j_{v_h}}. \quad (37c)$$

610 The constant term in (37a) reduces to

$$\begin{aligned}
(1 - \gamma) \left( T + 1 - \left| \bigcup_{h=1}^m \mathcal{Z}_{i_{v_h} \rightarrow j_{v_h}} \right| \right) &= (1 - \gamma) \left( T + 1 - \sum_{h=1}^m (j_{v_h} - i_{v_h} + 1) \right) \\
&= (1 - \gamma) \left( i_{v_1} + \sum_{h=2}^m (i_{v_h} - j_{v_{h-1}} - 1) + (T - j_{v_m}) \right).
\end{aligned} \tag{38}$$

611 Let the feasible region of (37) be denoted as  $\mathcal{X}$ . The second term in (37a), under constraints (37c),  
612 decomposes as

$$\begin{aligned}
&\min_{\{\theta_t\}_{t=0}^T \in \mathcal{X}} \left\{ \gamma \sum_{t=1}^T \mathbb{1}\{\theta_t \neq \theta_{t-1}\} \right\} \\
&= \gamma \min_{\{\theta_t\}_{t=0}^T \in \mathcal{X}} \left\{ \sum_{t=1}^{i_{v_1}} \mathbb{1}\{\theta_t \neq \theta_{t-1}\} \right\} + \gamma \sum_{h=1}^{m-1} \min_{\{\theta_t\}_{t=0}^T \in \mathcal{X}} \left\{ \sum_{t=j_{v_h}+1}^{i_{v_{h+1}}} \mathbb{1}\{\theta_t \neq \theta_{t-1}\} \right\} \\
&\quad + \gamma \min_{\{\theta_t\}_{t=0}^T \in \mathcal{X}} \left\{ \sum_{t=j_{v_m}+1}^T \mathbb{1}\{\theta_t \neq \theta_{t-1}\} \right\}
\end{aligned} \tag{40}$$

613 Note that each intermediate term in (40) simplifies as follows:

$$\begin{aligned}
\min_{\{\theta_t\}_{t=0}^T \in \mathcal{X}} \left\{ \sum_{t=j_{v_h}+1}^{i_{v_{h+1}}} \mathbb{1}\{\theta_t \neq \theta_{t-1}\} \right\} &= \underbrace{\min_{\{\theta_t\}_{t=0}^T \in \mathcal{X}} \left\{ \sum_{t=j_{v_h}+2}^{i_{v_{h+1}}-1} \mathbb{1}\{\theta_t \neq \theta_{t-1}\} \right\}}_{= f_{j_{v_h}+1 \rightarrow i_{v_{h+1}}-1}^{\text{Greedy}}} \\
&\quad + \underbrace{\mathbb{1}\{\theta_{j_{v_h}+1} \neq \theta_{j_{v_h}}\}}_{=1} + \underbrace{\mathbb{1}\{\theta_{i_{v_{h+1}}} \neq \theta_{i_{v_{h+1}}-1}\}}_{=1}.
\end{aligned} \tag{41}$$

614 Similarly, we find that the first and last term in (40) reduces to

$$\min_{\{\theta_t\}_{t=0}^T \in \mathcal{X}} \left\{ \sum_{t=1}^{i_{v_1}} \mathbb{1}\{\theta_t \neq \theta_{t-1}\} \right\} = \min_{\{\theta_t\}_{t=0}^T \in \mathcal{X}} \left\{ \sum_{t=1}^{i_{v_1}-1} \mathbb{1}\{\theta_t \neq \theta_{t-1}\} \right\} + \mathbb{1}\{i_{v_1} \geq 1\} = f_{0 \rightarrow i_{v_1}-1}^{\text{Greedy}} + \mathbb{1}\{i_{v_1} \neq 0\} \tag{42}$$

$$\begin{aligned}
\min_{\{\theta_t\}_{t=0}^T \in \mathcal{X}} \left\{ \sum_{t=j_{v_m}+1}^T \mathbb{1}\{\theta_t \neq \theta_{t-1}\} \right\} &= \min_{\{\theta_t\}_{t=0}^T \in \mathcal{X}} \left\{ \sum_{t=j_{v_m}+2}^T \mathbb{1}\{\theta_t \neq \theta_{t-1}\} \right\} + \mathbb{1}\{j_{v_m} + 1 \leq T\} \\
&= f_{j_{v_m}+1 \rightarrow T}^{\text{Greedy}} + \mathbb{1}\{j_{v_m} < T\}.
\end{aligned} \tag{43}$$

615

616 Combining (43), (42) with (40) and (39), we find that  $f_{0 \rightarrow T}(\widehat{\theta})$  is precisely the length of the path  
617  $(0, v_1, \dots, v_m, Z + 1)$  in the constructed graph  $\mathcal{G}$  with weights defined as (8).

618 Now suppose that there exists a path  $(0, \bar{v}_1, \bar{v}_2, \dots, \bar{v}_p, Z + 1)$  with length  $\bar{d} < f_{0 \rightarrow T}(\widehat{\theta})$ . Consider  
619 a solution  $\bar{\theta}$  such that: (i)  $\bar{\theta}$  is zero at zero-feasible sequences given by  $\bar{v}_1, \bar{v}_2, \dots, \bar{v}_p$ , and (ii)  $\bar{\theta}$  is  
620 obtained from  $\text{Greedy}(l, u, 0, i_{v_1} - 1)$ ,  $\text{Greedy}(l, u, j_{v_p} + 1, T)$  and  $\text{Greedy}(l, u, j_{v_h} + 1, i_{v_{h+1}} - 1)$ ,  
621 otherwise. It is easy to verify that  $\bar{\theta}$  is feasible and satisfies  $f_{0 \rightarrow T}(\bar{\theta}) \leq \bar{d}$  (the inequality could be  
622 strict if any solution reported by a call to the Greedy routine has zero values), which contradicts the  
623 optimality of  $\widehat{\theta}$ . Thus, we conclude that  $f_{0 \rightarrow T}(\widehat{\theta})$  is indeed the length of the shortest  $(0, Z + 1)$ -path  
624 in  $\mathcal{G}$ .  $\square$

## 625 A.6 Proof of Theorem 6

626 Algorithm 2 involves three main components: construct graph  $\mathcal{G}$  (line 3), solve a shortest problem  
627 on the constructed graph (line 4), and recover the optimal solution from the obtained shortest path.

628 Since  $\mathcal{G}$  is acyclic, the shortest path problem can be solved in time linear in the number of arcs,  
629 which is  $\mathcal{O}(Z^2)$ , via a simple labeling algorithm; see, e.g., Chapter 4.4. in [4]. Constructing graph  
630  $\mathcal{G}$  requires computing the costs of all arcs. A naïve implementation, where Algorithm 1 is called  
631 for every arc, would require  $\mathcal{O}(Z^2T)$  time and memory. However, from the second statement in  
632 Proposition 1, we note that a single call to  $\text{Greedy}(l, u, i, T)$  allows us to compute  $f_{i \rightarrow j}^{\text{Greedy}}$  for all  
633  $i \leq j \leq T$ . Therefore, Algorithm 1 needs to be invoked only  $\mathcal{O}(Z)$  times, and each call require  $\mathcal{O}(T)$   
634 leading to a total complexity of  $\mathcal{O}(ZT)$ . Moreover, given the shortest path, the optimal solution  
635 can be constructed by concatenating the solutions obtained from the calls of Greedy. Finally, since  
636  $Z \leq T + 2$ , we find that the overall complexity is dominated by that of constructing the graph. This  
637 completes the proof.  $\square$

## 638 B More on Numerical Experiments

639 In this section, we provide more information about the performance of the proposed estimator in  
640 different case studies. In the first case study, our goal is to compare the statistical performance of our  
641 proposed method with two other state-of-the-art methods, namely time-varying Graphical Lasso [17],  
642 and a modified version of the elementary  $\ell_1$  estimator [44, 47]. We will show that the proposed  
643 estimator outperforms the other two estimators, in terms of both sparsity recovery and estimation  
644 error. In the second case study, we showcase the statistical and computational performance of the  
645 proposed method on massive-scale datasets. In particular, we will show that our proposed estimation  
646 method can solve instances of the problem with more than 500 million variables in less than one hour,  
647 with almost perfect sparsity recovery. Moreover, we demonstrate the improvements in the runtime  
648 of our algorithm with parallelization. Finally, we conduct a case study on the correlation network  
649 inference in stock markets. In particular, we show that the inferred time-varying graphical model can  
650 correctly identify the stock market spikes based on the historical data.

651 All simulations are run on a desktop computer with an Intel Core i9 3.50 GHz CPU and 128GB RAM.  
652 The reported results are for an implementation in MATLAB R2020b.

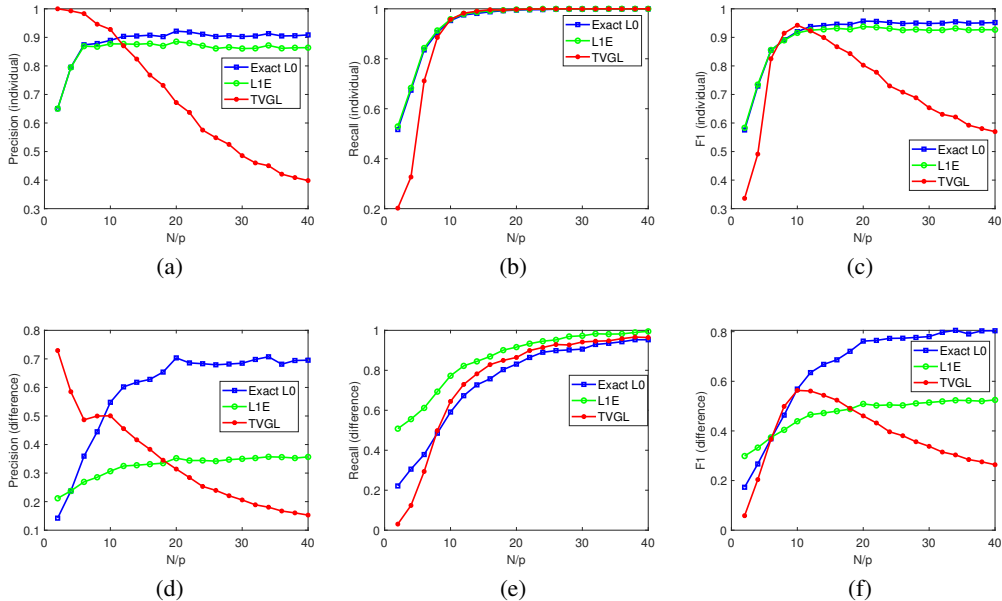

Figure 5: Precision, Recall, and F1-score for the estimated precision matrices and their differences using the proposed method (denoted as Exact  $L_0$ ), L1E, and TVGL (averaged over 10 independent trials).

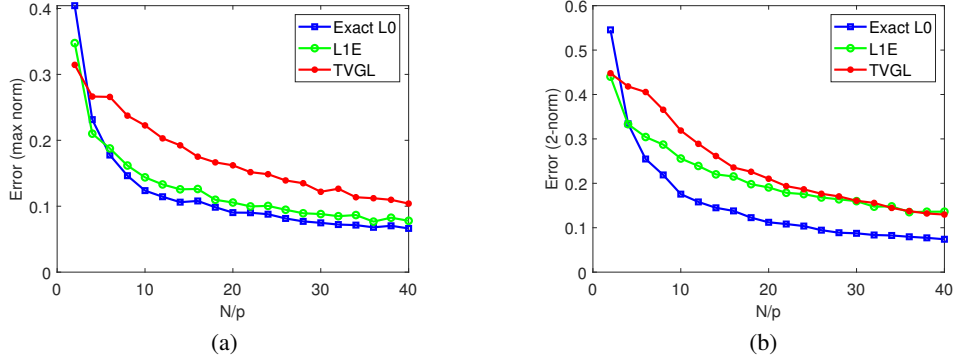

Figure 6: The normalized  $\ell_\infty$ -norm and induced 2-norm of the estimation error for the estimated precision matrices and their differences using the proposed method, L1E, and TVGL (averaged over 10 independent trials).

### 653 B.1 Case Study on Small Datasets

654 In this case study, we evaluate the statistical performance of the proposed estimator, compared to  
 655 two other methods, namely time-varying Graphical Lasso (TVGL) [17, 12], and a modified version of  
 656 the elementary  $\ell_1$  estimator (L1E) introduced in [44, 47]. As mentioned in the introduction, TVGL  
 657 is a well-known regularized MLE approach for estimating the sparsely-changing GMRFs. On the  
 658 other hand, different variants of L1E have been used to estimate static MRFs [47], and differential  
 659 networks with sparsity imposed only on the parameter differences [44]. Consider an  $\ell_1$  relaxation  
 660 of the proposed estimator (3), where the  $\ell_0$  penalties in the objective function are replaced with  $\ell_1$   
 661 penalties. The resulted estimator reduces to that of [47] for  $T = 0$ , and [44] for  $T = 1$  and  $\gamma = 1$ .

662 We consider randomly generated instances of sparsely-changing GMRFs, where the true inverse  
 663 covariance matrix is constructed as follows: at time  $t = 0$ , we set  $\Theta_0 = I_{d \times d} + \sum_{(i,j) \in \mathcal{S}} A^{(i,j)}$ ,  
 664 where  $d = 50$  and  $A^{(i,j)}$  is a sparse positive semidefinite matrix with exactly two nonzero off-diagonal  
 665 elements. In particular, we randomly select 100 edges in the graph (corresponding to 200 off-diagonal  
 666 entries in  $\Theta_0$ ) and collect their indices in  $\mathcal{S}$ . For every  $(i, j) \in \mathcal{S}$ , we set  $A_{ij}^{(i,j)} = A_{ji}^{(i,j)} = -0.4$  and  
 667  $A_{ii}^{(i,j)} = A_{jj}^{(i,j)} = 0.4$ . Clearly,  $A^{(i,j)} \succeq 0$ , and hence,  $\Theta_0 \succ 0$ . Moreover, at every time  $t = 1, \dots, 9$ ,  
 668 exactly 20 nonzero off-diagonal entries are added to  $\Theta_t$  according to the aforementioned rules, and  
 669 20 nonzero off-diagonal entries are deleted by reversing the above procedure. Our goal is  
 670 to estimate the true sparsely-changing precision matrices  $\{\Theta_t\}_{t=0}^9$  based on a varying number of  
 671 samples  $N_t$ . We evaluate the accuracy of the different methods in terms of Recall, Precision, and  
 672 F1-score values, defined as

$$673 \text{ Recall} = \frac{\text{TP}}{\text{TP} + \text{FP}}, \quad \text{Precision} = \frac{\text{TP}}{\text{TP} + \text{FN}}, \quad \text{F1-score} = \frac{2 \times \text{Recall} \times \text{Precision}}{\text{Recall} + \text{Precision}}, \quad (44)$$

673 where TP, FP, and FN respectively denote the number of true positives, false positives, and false  
 674 negatives in the estimated sequence of precision matrices. In all of our experiments, we set  $\gamma = 0.7$ .  
 675 Moreover, according to Theorem 3, the parameters  $\nu_t$  and  $\lambda$  are chosen as  $C_1 \sqrt{\frac{\log d}{T}}$  and  $C_2 \sqrt{\frac{\log d}{T}}$ ,  
 676 respectively, where the constants  $C_1$  and  $C_2$  are inferred directly from the data samples via Bayesian  
 677 Inference Criterion (BIC) [32, 14]. Similarly, we set the regularization coefficients  $\gamma_1 = C_3 \sqrt{\frac{\log d}{N_t}}$   
 678 and  $\gamma_2 = C_4 \sqrt{\frac{\log d}{N_t}}$  for TVGL (2), where the constants  $C_3$  and  $C_4$  are selected via BIC.

679 Figure 5 illustrates the accuracy of the estimated precision matrices for different number of samples.  
 680 It can be seen that the proposed estimator outperforms L1E and TVGL in terms of Precision value,  
 681 but has a slightly worse Recall value. In particular, both L1E and TVGL tend to *overestimate* the  
 682 number of nonzero elements in the precision matrices. This overestimation naturally reduces the  
 683 number of false negatives (leading to better Precision values), while significantly increasing the



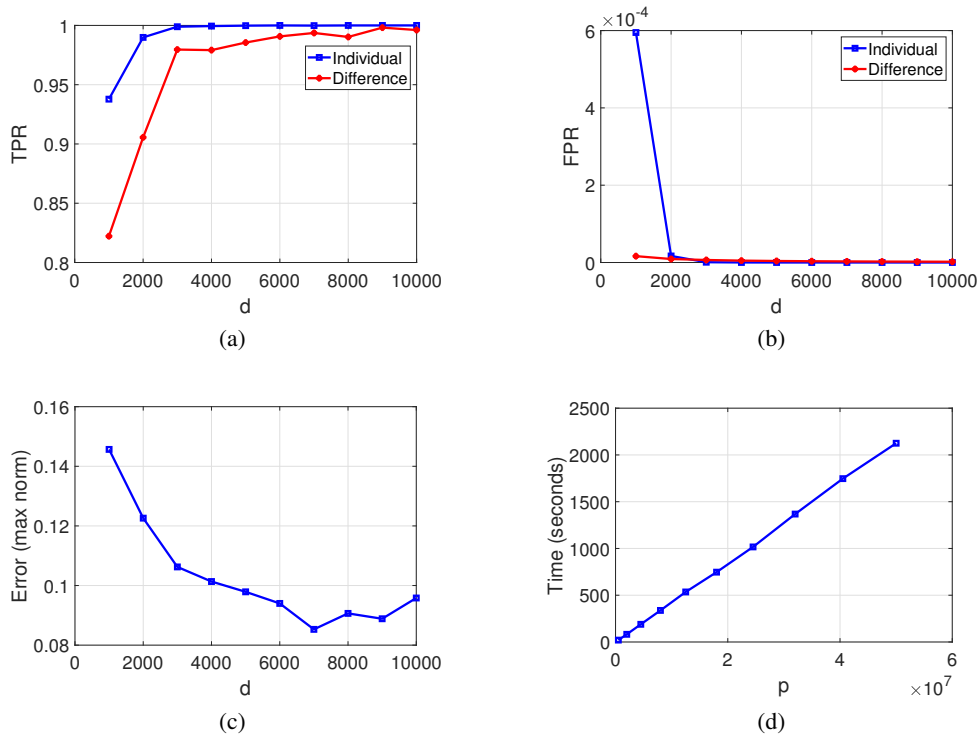

Figure 7: TPR, FPR,  $\ell_1$ -norm estimation error, and the runtime of the proposed method for fixed  $T$  and different values of  $d$ . The number of samples  $N_t$  is set to  $d/2$  for every  $t$ . The runtime is shown with respect to  $p = d(d + 1)/2$ .

684 number of false positives (leading to worse Recall values). Moreover, F1-score shows the overall  
 685 performance of the estimates in terms of the sparsity recovery. It can be seen that the proposed  
 686 estimator outperforms the other two methods. In particular, both L1E and TVGL perform poorly on  
 687 the sparsity recovery of the parameter differences. Finally, Figure 6 depicts the normalized  $\ell_\infty$ -norm  
 688 and induced 2-norm estimation errors. It can be seen that TVGL incurs a relatively large  $\ell_\infty$ -norm  
 689 error due to the shrinking effect of its regularization.

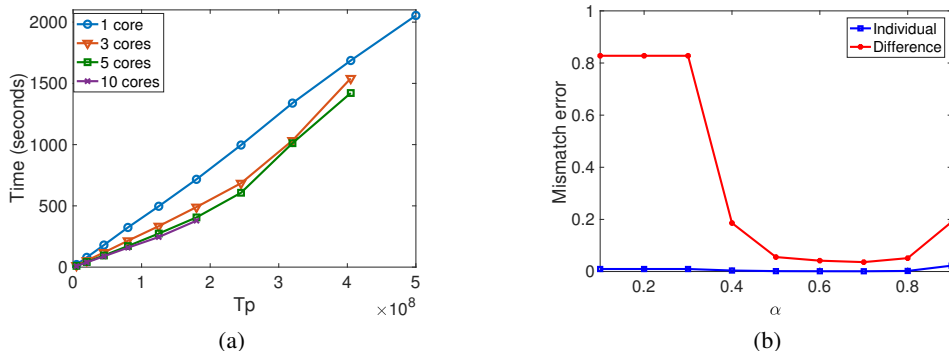

Figure 8: (a) The runtime of the parallelized algorithm with respect to the number of variables  $Tp$ , for different number of cores. (b) The normalized mismatch error with respect to the regularization coefficient  $\gamma$ , for the choices of parameters  $d = 4000$ ,  $T = 10$ , and  $N_t = 2000$  for every  $t$ .

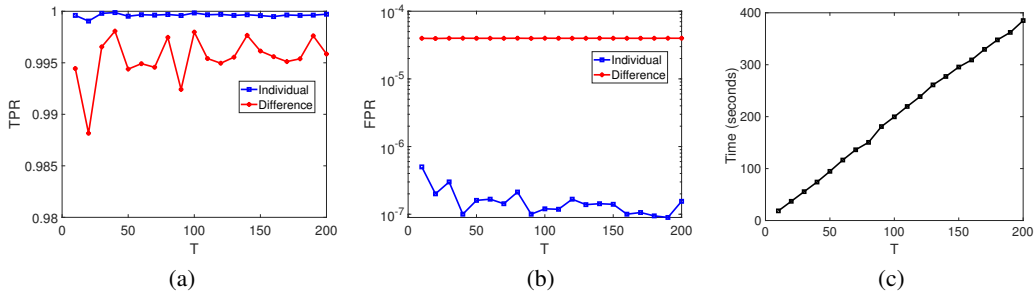

Figure 9: TPR, FPR, and the runtime of the proposed method for fixed  $d$  and different values of  $T$ . The number of samples  $N_t$  is set to  $2d$  for every  $t$ .

690 **B.2 Case Study on Large Datasets**

691 In this case study, we analyze the performance of the proposed estimator on large datasets, with  
 692 different values of  $d$  and  $T$ . In particular, we will analyze the runtime of the proposed algorithm  
 693 and its statistical performance in high dimensional settings, where  $N_t < d$  for every  $t = 1, 2, \dots, T$ .  
 694 Moreover, we will report the improvements in the runtime with parallelization, and analyze the  
 695 robustness of the estimator for different choices of the regularization coefficient  $\gamma$ .

696 Consider the class of synthetically generated sparsely-changing GMRFs with random precision  
 697 matrices, as explained in Subsection B.1. In the first experiment, we fix  $T = 10$  and change the  
 698 values of  $d$ . The number of nonzero elements in the individual precision matrices and their differences  
 699 are set to  $3d$  and  $0.04d$ , respectively. We evaluate the performance of the proposed method in the high  
 700 dimensional settings, where  $N_t = d/2$  for every  $t = 0, \dots, T$ . The parameters  $\lambda_t$  and  $\nu_t$  are fine-  
 701 tuned similar to the previous case study and  $\gamma = 0.7$  in all instances. Moreover, define TPR and FPR  
 702 for the individual parameters and their differences as the TP and FP values, normalized by the total  
 703 number of nonzero and zero elements in the true precision matrices and their differences, respectively.  
 704 Clearly, both TPR and FPR are between 0 and 1, with TPR = 1 and FPR = 0 corresponding to the  
 705 perfect recovery of the sparsity patterns. Figure 7 depicts TPR, FPR, and the  $\ell_1$ -norm error of the  
 706 estimated parameters, as well as the runtime of our algorithm for different values of  $d$ . It can be seen  
 707 that both TPR and FPR values improve with the dimension for the estimated parameters and their  
 708 differences. Moreover, the runtime of our algorithm scales almost linearly with  $p = d(d + 1)/2$ ,  
 709 which is in line with the result of Theorem 2. Using our algorithm, we reliably infer instances of  
 710 sparsely-changing GMRFs with more than 500 million variables in less than one hour.

711 As mentioned before, our proposed optimization framework is amenable to parallelization due to its  
 712 elementwise decomposable nature. Figure 8a illustrates the runtime of our parallelized algorithm with  
 713 respect to the total number of variables (fixed  $T$  and varying  $p$ ), for different number of cores. Using 5  
 714 cores, the runtime of our algorithm is improved by 40% on average. On the other hand, using 10 cores  
 715 deteriorates the performance due to the shared memory limitations. Finally, we evaluate the accuracy  
 716 of the estimated parameters for different choices of the regularization coefficient  $\gamma$ . In particular, we  
 717 fix  $d = 4000$ ,  $T = 10$ , and  $N_t = 2000$  for every  $t$ , and depict the normalized mismatch error in the  
 718 sparsity pattern of the estimated parameters and their differences for  $\gamma \in \{0.1, 0.2, \dots, 1\}$ . Based on  
 719 this figure, it can be concluded that overall performance of the proposed method is not too sensitive  
 720 to specific choice of the regularization parameter  $\gamma$ . In particular, it can be seen that the normalized  
 721 mismatch error remains approximately the same for  $\gamma \in [0.5, 0.8]$ .

722 In the next experiment, we set  $d = 1000$  and  $N_t = 2d$ , and evaluate the performance of the proposed  
 723 method for different values of  $T \in \{10, 20, 30, \dots, 200\}$ . Figure 9a shows TPR for the estimated  
 724 precision matrices and their differences. It can be seen that TPR for the estimated precision matrices  
 725 is close to 1 for all values of  $T$ . Moreover, the TPR for the differences of the estimated precision  
 726 matrices is at least 0.966. On the other hand, Figure 9b shows that the FPR for the estimated precision  
 727 matrices is close to zero. Finally, Figure 9c shows that the runtime of the proposed algorithm scales  
 728 almost linearly with  $T$ . Together with Figure 7d, this implies that the empirical complexity of the  
 729 algorithm is linear in both  $p$  and  $T$ .

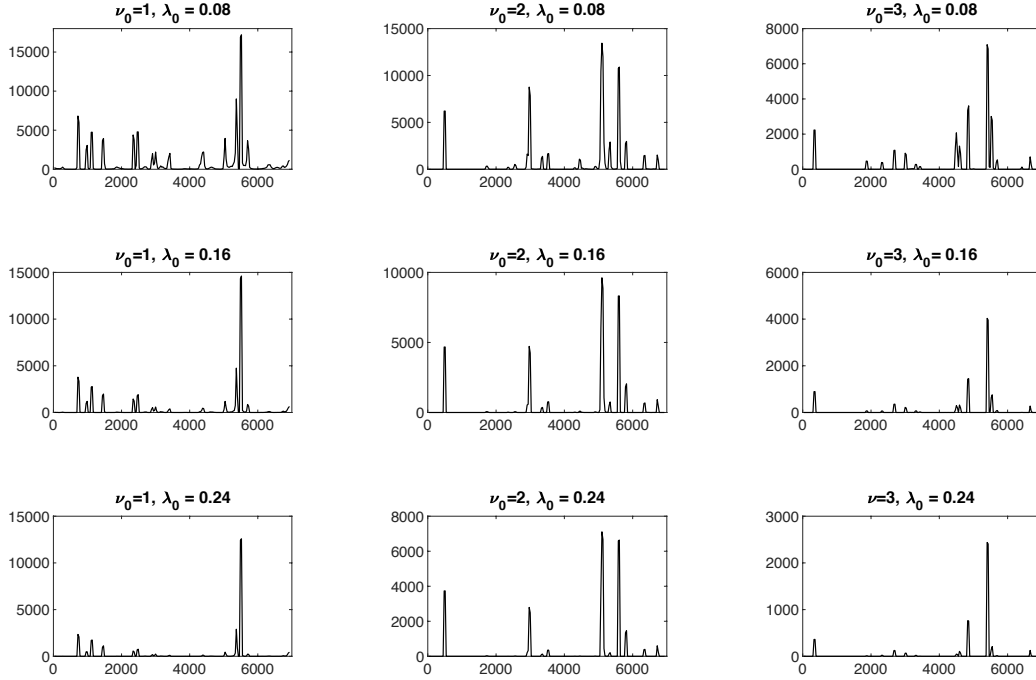

Figure 10: The number of changes in the estimated stock correlation network, for different choices of  $\nu_0$  and  $\lambda_0$ . The  $x$ -axis represent the day indexes.

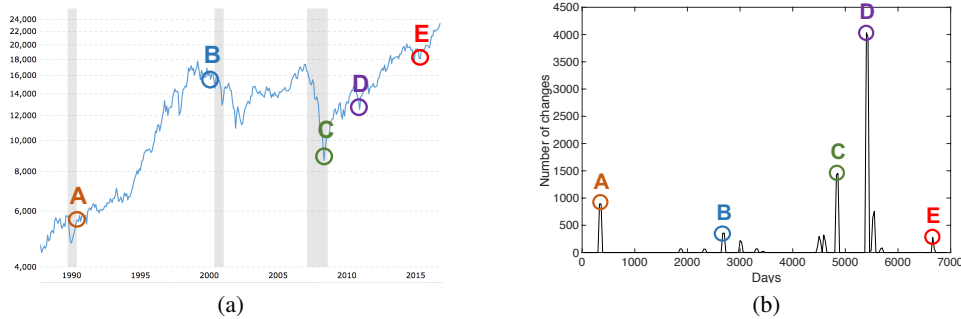

Figure 11: (a) NASDAQ historical chart from 1988 to 2017 [2]. (b) The number of changes in the estimated correlation network for  $\nu_0 = 3$  and  $\lambda_0 = 0.16$ .

### 730 B.3 Case Study on Stock Market

731 Finally, we illustrate the performance of our algorithm for the inference of stock correlation network.  
732 We consider the daily stock prices for 214 securities from 1990/01/04 to 2017/08/10, with the total  
733 number of 6990 days ( $d = 214$  and  $T = 6990$ ). Due to the continuously changing nature of the stock  
734 correlation network, we will use the kernel averaging approach that was introduced in Subsection 4.1  
735 to estimate the underlying time-varying network. In particular, we consider a Gaussian kernel with  
736 bandwidth  $h = 0.3T^{-1/3}$  to obtain the sequence of weighted sample covariance matrices. Using  
737 the constructed sample covariance matrices, we estimate the sparsely-changing precision matrix  
738  $\Theta(t/T)$  at discrete times  $t \in \{30, 60, 90, \dots, 6990\}$ . Moreover, we set  $\gamma = 0.9$ ,  $\lambda_t = \lambda_0 \sqrt{\frac{\log(d)}{Th}}$ ,  
739 and  $\nu_t = \nu_0 \sqrt{\frac{\log(d)}{Th}}$ , for some constants  $\lambda_0$  and  $\nu_0$  to be defined later. Note that these choices of the  
740 parameters are consistent with the assumptions of Theorem 4.

741 Figure 10 shows the number of changes in the sparsity pattern of the estimated correlation network,  
742 for different choices of the parameters  $\nu_0$  and  $\lambda_0$ . A drastic change in the correlation network signals  
743 a *spike* in the stock market, which may reflect the market's response to unexpected global events. It  
744 can be seen that, for small values of  $\nu_0$  and  $\lambda_0$ , the estimated network can detect both small and large  
745 spikes. As the values of  $\nu_0$  and  $\lambda_0$  increase, the small spikes gradually diminish, and the estimated  
746 network only "picks up" major changes in the network. Nonetheless, there is a recurring pattern of  
747 spikes in these plots that is almost insensitive to different values of  $\nu_0$  and  $\lambda_0$ . A closer look at this  
748 recurring pattern sheds light on the behavior of the market. Figure 11 shows the number of changes  
749 in the estimated network, for the choices of  $\nu_0 = 3$  and  $\lambda_0 = 0.16$ , together with the historical chart  
750 of National Association of Securities Dealers Automated Quotations (NASDAQ) [1]. It can be seen  
751 that the major spikes in the estimated network can be attributed to the historical stock market *crashes*.  
752 For instance, the spikes A, B, and C respectively correspond to the "early 1990s recession", "dot-com  
753 bubble", and "global financial crisis"; see [5] for more details. Interestingly, the estimated network  
754 can also detect other historical (but less severe) downturns in 2011 (point D) and 2016 (point E).
